# Supplementary material for: On the effect of catalyst loading in Pd-catalysed allylic alkylation
Source: Royal Society of Chemistry journal article supplement (doi:10.1039/b007785m), 2000-01-01
Supplement: b007785m.doc [file b007785m.doc]

**On the effect of Catalyst loading in Pd-catalysed Allylic Alkylation**

**(for electronic supplementary information)**

In reference 1a,[[1]](#endnote-2) it is reported that lower ee’s are obtained for the reaction **6****7** with high catalysts loadings. [e.g. 53 % ee, 4 mol %; 92 % ee, 1 mol %, 97 % ee 0.5 mol %]. This is suggested to be the result of a memory effect arising from process **A**, interconverting asymmetric ion-pairs **3** and **3’**, being slower than process **B** (nucleophilic attack) - see Figure 3 The interpretation is justified as follows: *“by lowering the catalyst loading which, in effect, reduces the concentration of the -allylpalladium intermediate, the unimolecular equilibration event now out-competes the bimolecular nucleophilic addition”.*

**
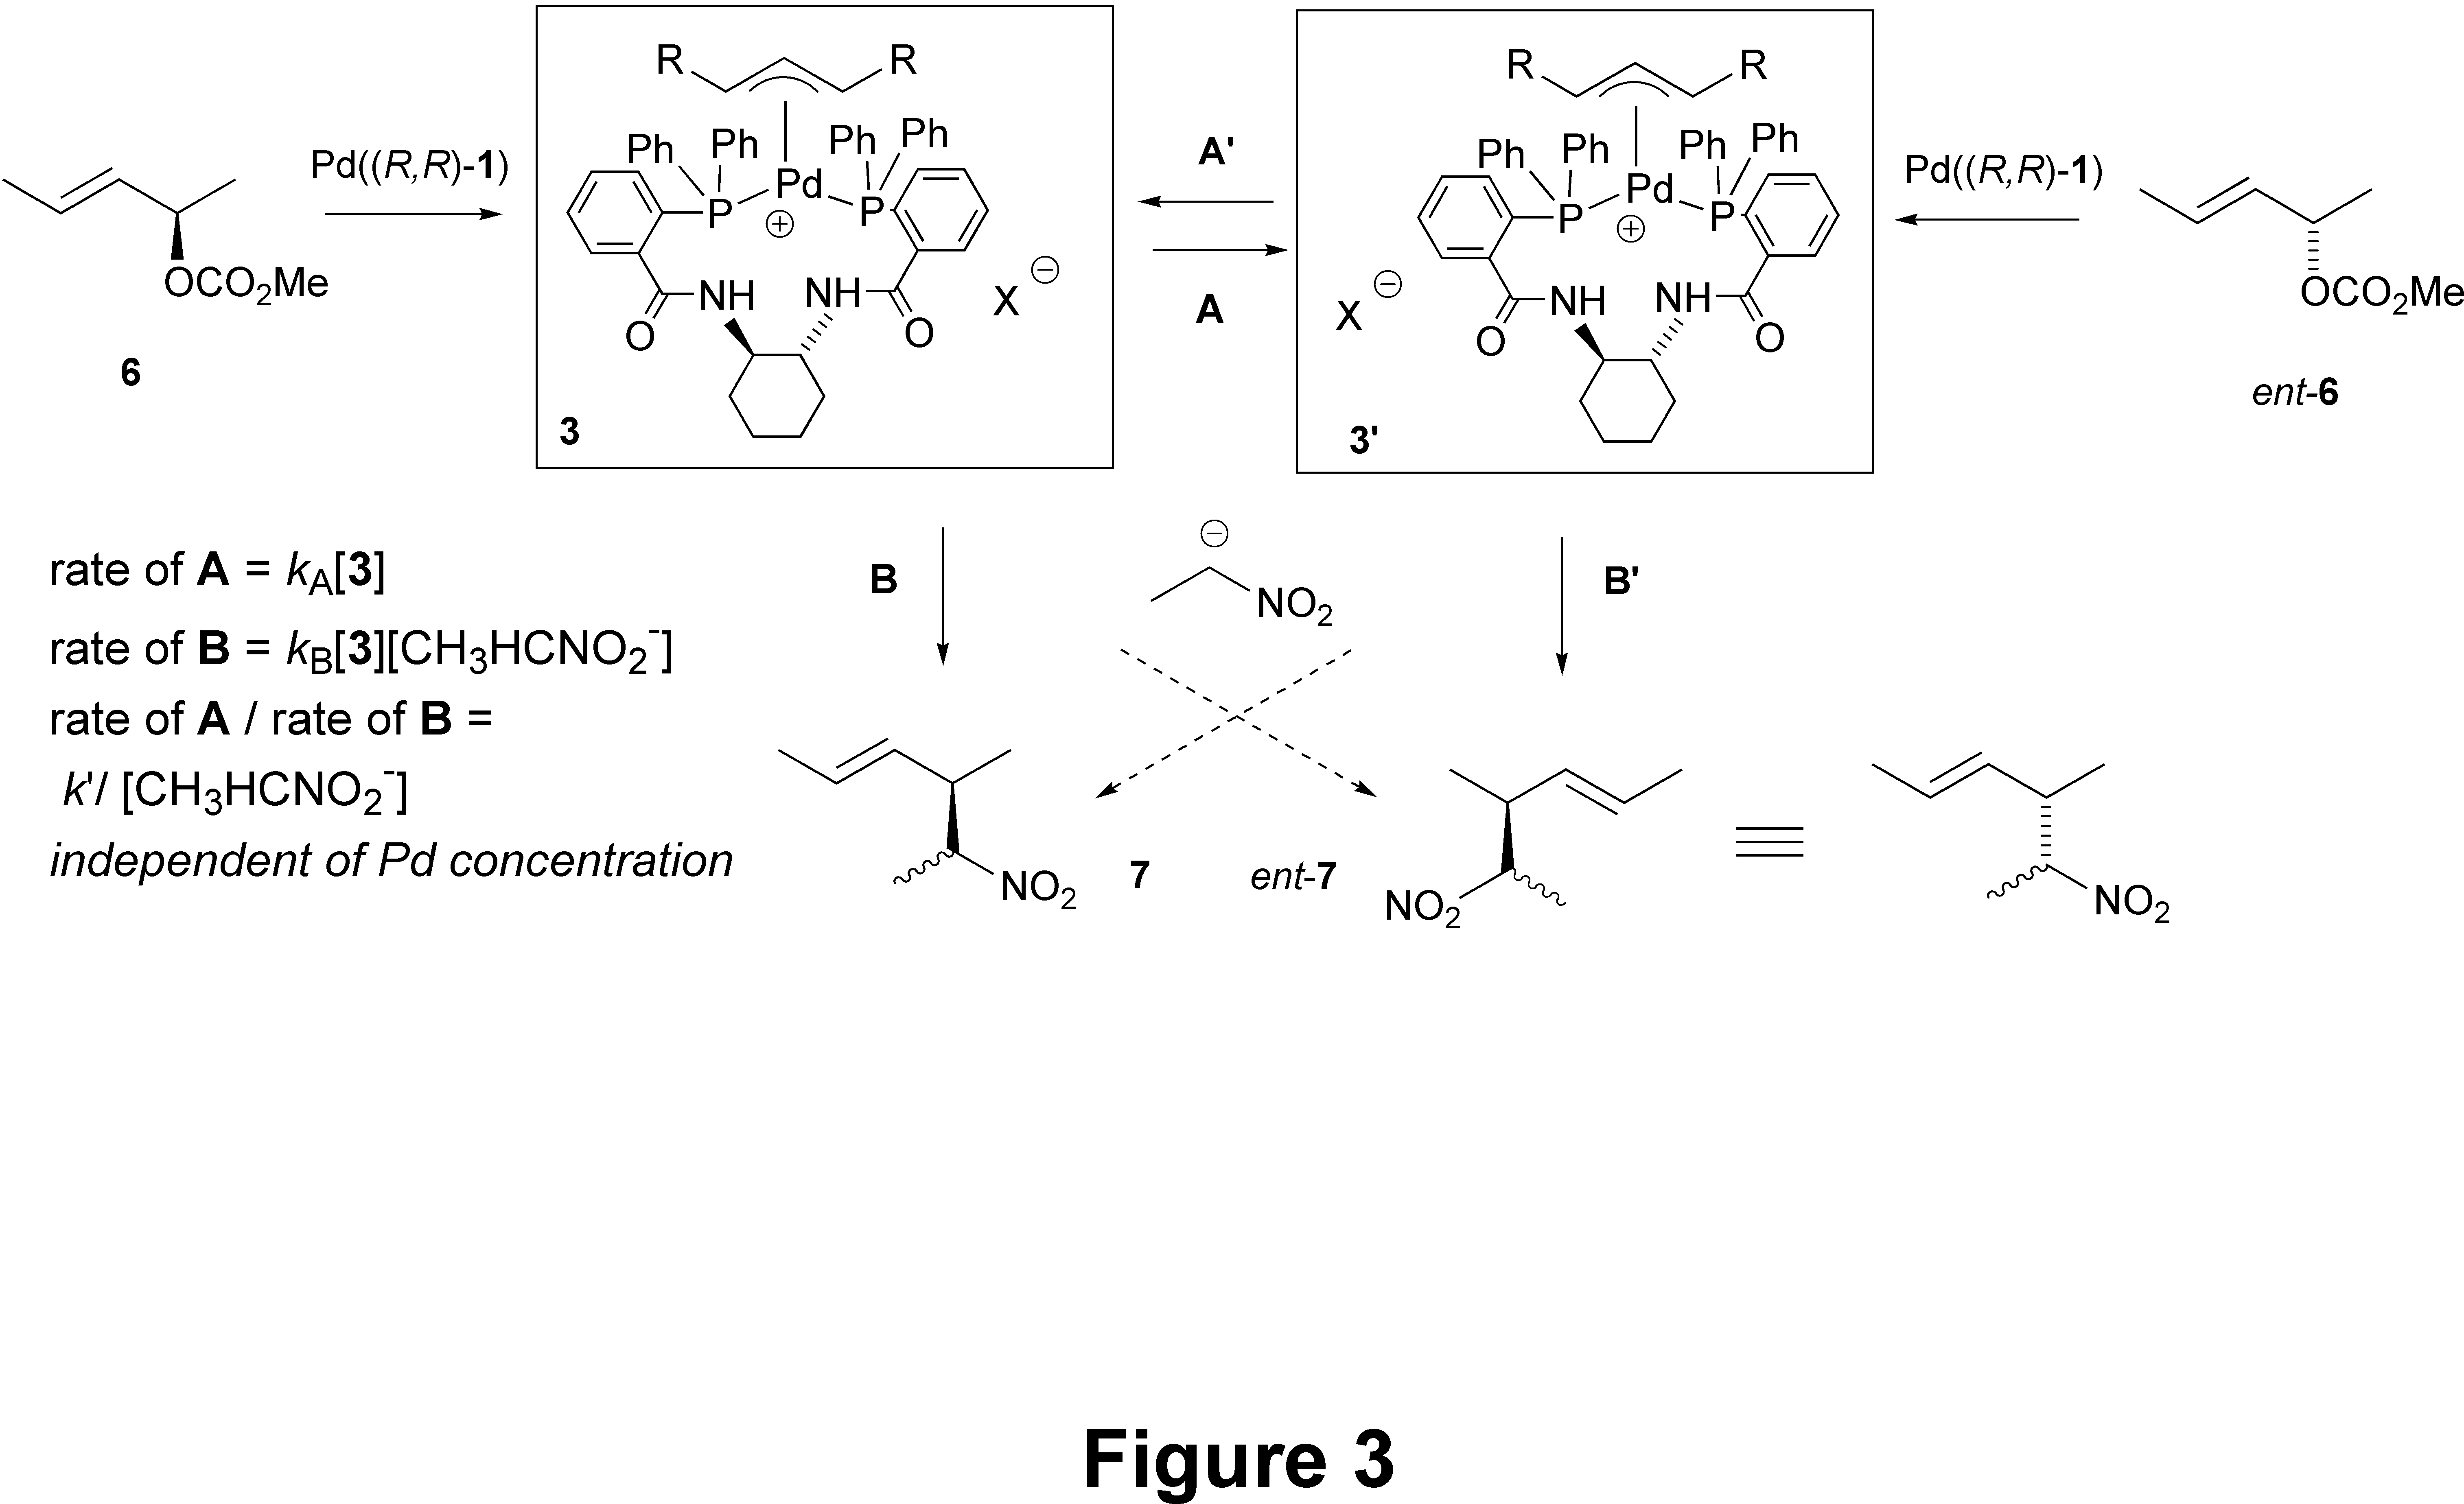
**

However classical chemical kinetics would seem to predict no dependency on catalyst concentration for the *relative* rates of these two processes, **A** and **B**. Further isotopic desymmetrisation experiments[[2]](#endnote-3) performed in our laboratories, confirm there is a memory effect, albeit complicated by issues of diastereocontrol. Thus reactions of -2H-**6**, (96% 2H) with EtNO2 to generate -2H-**7** were conducted under the conditions described in the literature:1 CH2Cl2 was employed as solvent with catalyst generated *in situ* from 2 mol % [Pd2dba3.CHCl3] and 6 mol % **1a**. The additives *O,N*-bis(trimethylsilyl)acetamide and Bu4NCl were also employed as described. These reactions gave 1.0 / 1.2 -2H-**7** in 66% ee, 92% yield (after chromatography), 27% de; ee *diast-***7** 39% (de and ee measurements were made by chiral-GC; -ratios were measured by 1H and 13C NMR). We note when 4 mol % catalyst is generated from *racemic* **1a**, the diastereomeric excess observed in **7** is much higher (> 85 %) due to powerful kinetic resolution and a high de in the *matched manifold*.

**References**

1. a) B. M. Trost, J.-P. Surivet, *J. Am. Chem. Soc.,* **2000**, *122*, 6291; b) *ibid*, *Angew. Chem. Int. Ed.* **2000**, *39*, 3122. [↑](#endnote-ref-2)
2. G. C. Lloyd-Jones, S. C. Stephen, *Chem. Eur. J.,* **1998**, *4*, 2539 [↑](#endnote-ref-3)
